# Supplementary material for: Association of several loci of SMAD7 with colorectal cancer: A meta-analysis based on case–control studies
Source: PubMed Central journal article supplement (PMC9829263; doi:10.1097/md.0000000000032631), 2023-01-06
Supplement: medi-102-e32631-s001.pdf [file medi-102-e32631-s001.pdf]

**Supplemental Table 1: Literature Searching Strategy.**

| Database       | Search Strategy                                                                                                                                                                                                                                                                                                                                                                                                                                                                                                                                                                                                                                                                                                                                                                                                                                                                                                                                                                                                                                                                                                                                                   |
|----------------|-------------------------------------------------------------------------------------------------------------------------------------------------------------------------------------------------------------------------------------------------------------------------------------------------------------------------------------------------------------------------------------------------------------------------------------------------------------------------------------------------------------------------------------------------------------------------------------------------------------------------------------------------------------------------------------------------------------------------------------------------------------------------------------------------------------------------------------------------------------------------------------------------------------------------------------------------------------------------------------------------------------------------------------------------------------------------------------------------------------------------------------------------------------------|
| PubMed         | <p>((((((Case-Control Study[MeSH Terms]) OR (Case-Control Studies[Title/Abstract])) OR (Studies, Case-Control[Title/Abstract])) OR (Study, Case-Control[Title/Abstract])) AND (((((((Single Nucleotide Polymorphism[MeSH Terms])) OR (Nucleotide Polymorphism, Single[Title/Abstract])) OR (Nucleotide Polymorphisms, Single[Title/Abstract])) OR (Polymorphisms, Single Nucleotide[Title/Abstract]) OR (Single Nucleotide Polymorphisms[Title/Abstract])) OR (SNPs[Title/Abstract])) OR (Polymorphism, Single Nucleotide[Title/Abstract]))) AND (((((smad7 protein[MeSH Terms]) OR (madh7 protein[MeSH Terms])) OR (rs4939827[Title/Abstract])) OR (rs12953717[Title/Abstract])) OR (rs4464148[Title/Abstract]))) AND (((((((((((Neoplasia[MeSH Terms])) OR (Tumor[Title/Abstract])) OR (Neoplasm[Title/Abstract])) OR (Tumors[Title/Abstract])) OR (Neoplasias[Title/Abstract])) OR (Cancer[Title/Abstract])) OR (Malignant Neoplasm[Title/Abstract])) OR (Malignancy[Title/Abstract])) OR (Malignancies[Title/Abstract])) OR (Malignant Neoplasms[Title/Abstract])) OR (Neoplasm, Malignant[Title/Abstract])) OR (Neoplasms, Malignant[Title/Abstract]))))</p> |
| Web of Science | <p>(((TS=("Case-Control Stud*")) OR TS=("Stud*, Case-Control" )) OR TS=("Case-Comparison Stud*")) and (((((((TS=("Single Nucleotide Polymorphism*")) OR TS=("Nucleotide Polymorphism*, Single")) OR TS=("Polymorphism*, Single Nucleotide")) OR TS=(Allelomorph* )) OR TS=(SNPs)) OR TS=(Allele)) OR TS=(Genetic Mutation)) OR TS=(Mutation*)) and (((((((TS=(Smad7 Protein)) OR TS=(Madh7 Protein)) OR TS=(Smad7)) OR TS=(Madh7)) OR TS=(Sma- and Mad-Related)) OR TS=(Mothers Against Decapentaplegic Homolog)) OR AB=(rs12953717)) OR AB=(rs4939827)) OR AB=(rs4464148)) and (((((TS=(Neoplas*)) OR TS=(Cancer*)) OR TS=(Tumor*)) OR TS=(Malignanc*)) OR TS=("Malignant Neoplasm*")) OR TS=("Neoplasm*, Malignant"))</p>                                                                                                                                                                                                                                                                                                                                                                                                                                       |
| Embase         | <p>('malignant neoplasm'/exp OR 'cancer':ti,ab,kw OR 'cancers':ti,ab,kw OR 'malignant neoplasia':ti,ab,kw OR 'malignant neoplasm':ti,ab,kw OR 'malignant neoplastic disease':ti,ab,kw OR 'malignant tumor':ti,ab,kw OR 'malignant tumour':ti,ab,kw OR</p>                                                                                                                                                                                                                                                                                                                                                                                                                                                                                                                                                                                                                                                                                                                                                                                                                                                                                                         |

|                                                       |                                                                                                                                                                                                                                                                                                                                                                                                                                                                                                                                                                                                                                                                                                                                                                                                                                         |
|-------------------------------------------------------|-----------------------------------------------------------------------------------------------------------------------------------------------------------------------------------------------------------------------------------------------------------------------------------------------------------------------------------------------------------------------------------------------------------------------------------------------------------------------------------------------------------------------------------------------------------------------------------------------------------------------------------------------------------------------------------------------------------------------------------------------------------------------------------------------------------------------------------------|
|                                                       | <p>'neoplasia, malignant':ti,ab,kw OR 'tumor, malignant':ti,ab,kw OR 'tumour, malignant':ti,ab,kw) and ('case control study'/exp OR 'case control study' OR 'case-control studies' OR 'case-control study' OR 'control study, case' OR 'matched case control' OR 'matched case control studies' OR 'matched case control study' ) and ('smad7 protein'/exp OR 'sma and mad related protein 7':ti,ab,kw OR 'smad7 protein':ti,ab,kw OR 'smad7 transcription factor':ti,ab,kw OR 'protein smad7':ti,ab,kw OR 'transcription factor smad7':ti,ab,kw OR rs4939827:ti,ab OR rs12953717:ti,ab OR rs4464148:ti,ab) and ('single nucleotide polymorphism'/exp OR 'polymorphism, single nucleotide':ti,ab,kw OR 'single nucleotide polymorphism':ti,ab,kw OR 'single nucleotide variant':ti,ab,kw OR 'single nucleotide variation':ti,ab,kw)</p> |
| <p>China National Knowledge Infrastructure (CNKI)</p> | <p>( (主题：肿瘤) OR (主题：癌症) OR (主题：恶性肿瘤) OR (主题：癌) ) AND ( (主题：Smad 7) OR (主题：sma and mad related protein 7) OR (主题：rs4939827) OR (主题：rs4464148) OR (主题：rs12953717) ) AND ( (主题：单核苷酸) OR (主题：多态性) OR (主题：单核苷酸多肽现象) OR (主题：SNP) OR (主题：Polymorphism, Single Nucleotide) OR (主题：Polymorphism) OR (主题：突变) OR (主题：等位基因) ) AND ( (摘要：病例对照研究) OR (摘要：基于病例研究) OR (摘要：病例比较研究) OR (摘要：病例关联研究) OR (摘要：配对病例对照研究) OR (摘要：成批病例对照研究) )</p>                                                                                                                                                                                                                                                                                                                                                                                                                |
| <p>Wan Fang database</p>                              | <p>(主题：( " 肿瘤 " ) OR 主题：( " 癌症 " ) OR 主题：( " 恶性肿瘤 " ) OR 主题：( " 癌 " )) AND (主题：( " Smad 7 " ) OR 主题：( " sma and mad related protein 7 " ) OR 主题：( " rs4939827 " ) OR 主题：( " rs4464148 " ) OR 主题：( " rs12953717 " )) AND (主题：( " 单核苷酸 " ) OR 主题：( " 多态性 " ) OR 主题：( " 单核苷酸多肽现象 " ) OR 主题：( " SNP " ) OR 主题：( " Polymorphism, Single Nucleotide " ) OR 主题：( " Polymorphism " ) OR 主题：( " 突变 " ) OR 主题：( " 等位基因 " )) AND (摘要：( " 病例对照研究 " ) OR 摘要：( " 基于病例研究 " ) OR 摘要：( " 病例比较研究 " ) OR 摘要：( " 病例关联研究 " ) OR 摘要：( " 配对病例对照研究 " ) OR 摘要：( " 成批病例对照研究 " ))</p>                                                                                                                                                                                                                                                                              |
