# Supplementary material for: Association of several loci of SMAD7 with colorectal cancer: A meta-analysis based on case–control studies
Source: PubMed Central journal article supplement (PMC9829263; doi:10.1097/md.0000000000032631), 2023-01-06
Supplement: medi-102-e32631-s002.pdf [file medi-102-e32631-s002.pdf]

Supplemental Table 2. Assessing the quality of incorporated studies using the Newcastle-Ottawa scale.

| author            | year | Selection |        |        |        | Comparability | Exposure |        |        | Quality | Score |
|-------------------|------|-----------|--------|--------|--------|---------------|----------|--------|--------|---------|-------|
|                   |      | Item 1    | Item 2 | Item 3 | Item 4 | Item 5        | Item 6   | Item 7 | Item 8 |         |       |
| <i>RS4939827</i>  |      |           |        |        |        |               |          |        |        |         |       |
| Broderick         | 2007 | *         | *      |        | *      | **            | *        | *      |        | High    | 7     |
| Tenesa            | 2008 | *         | *      |        | *      | **            | *        | *      |        | High    | 7     |
| Curtin            | 2009 | *         | *      | *      | *      | **            | *        | *      |        | High    | 8     |
| Thompson          | 2009 | *         | *      | *      | *      | **            |          | *      |        | High    | 7     |
| Pittman           | 2009 | *         | *      |        | *      | **            | *        | *      |        | High    | 7     |
| Slattery          | 2010 | *         | *      |        | *      | **            | *        | *      |        | High    | 7     |
| Xiong             | 2010 | *         | *      | *      | *      | **            | *        | *      |        | High    | 8     |
| von Hoslt         | 2010 | *         | *      |        | *      | **            | *        | *      |        | High    | 7     |
| Kupfer            | 2010 | *         | *      |        | *      | **            | *        | *      |        | High    | 7     |
| Mates             | 2010 | *         | *      | *      |        | **            |          | *      |        | High    | 6     |
| Mates             | 2011 | *         | *      | *      |        | **            |          | *      |        | High    | 6     |
| Cui               | 2011 | *         | *      | *      | *      | **            | *        | *      |        | High    | 8     |
| Li                | 2011 | *         | *      | *      | *      | **            | *        | *      |        | High    | 8     |
| Ho                | 2011 | *         | *      |        | *      | **            | *        | *      |        | High    | 7     |
| Song              | 2012 | *         | *      |        | *      | **            | *        | *      |        | High    | 7     |
| Lubbe             | 2012 | *         | *      |        | *      | **            | *        | *      |        | High    | 7     |
| Garcia-Albeniz    | 2012 | *         | *      |        | *      | **            | *        | *      |        | High    | 7     |
| Phipps            | 2012 | *         | *      |        | *      | **            | *        | *      |        | High    | 7     |
| Kirac             | 2013 | *         | *      | *      | *      | **            | *        | *      |        | High    | 8     |
| Yang              | 2014 | *         | *      | *      |        | **            | *        | *      |        | High    | 7     |
| Kurlapska         | 2014 | *         | *      | *      |        | **            | *        | *      |        | High    | 7     |
| Zhang             | 2014 | *         | *      | *      | *      | **            |          | *      |        | High    | 7     |
| Hong              | 2015 | *         | *      | *      | *      | *             | *        | *      |        | High    | 7     |
| Baert-Desurmont   | 2016 | *         | *      |        | *      | **            | *        | *      |        | High    | 7     |
| Abd El-Fattah     | 2016 | *         | *      |        | *      | **            | *        | *      |        | High    | 7     |
| Alonso-Molero     | 2017 | *         | *      | *      |        | **            | *        | *      |        | High    | 7     |
| Shaker            | 2018 | *         | *      |        | *      | **            | *        | *      |        | High    | 7     |
| Reilly            | 2021 | *         | *      |        |        | **            | *        | *      |        | High    | 6     |
| Alidoust          | 2022 | *         | *      |        | *      | **            | *        | *      |        | High    | 7     |
| <i>RS4464148</i>  |      |           |        |        |        |               |          |        |        |         |       |
| Broderick         | 2007 | *         | *      |        | *      | **            | *        | *      |        | High    | 7     |
| Thompson          | 2009 | *         | *      | *      | *      | **            |          | *      |        | High    | 7     |
| Curtin            | 2009 | *         | *      | *      | *      | **            | *        | *      |        | High    | 8     |
| Pittman           | 2009 | *         | *      |        | *      | **            | *        | *      |        | High    | 7     |
| Ho                | 2011 | *         | *      |        | *      | **            | *        | *      |        | High    | 7     |
| Zhang             | 2014 | *         | *      | *      | *      | **            |          | *      |        | High    | 7     |
| Kurlapska         | 2014 | *         | *      | *      |        | **            | *        | *      |        | High    | 7     |
| Damavand          | 2015 | *         | *      |        | *      | **            | *        | *      |        | High    | 7     |
| Serrano-fernandez | 2015 | *         | *      | *      | *      | **            | *        | *      |        | High    | 8     |
| Reilly            | 2021 | *         | *      |        |        | **            | *        | *      |        | High    | 6     |
| <i>RS12953717</i> |      |           |        |        |        |               |          |        |        |         |       |
| Broderick         | 2007 | *         | *      |        | *      | **            | *        | *      |        | High    | 7     |
| Middeldorp        | 2009 | *         | *      |        | *      | *             | *        | *      |        | High    | 6     |
| Curtin            | 2009 | *         | *      | *      | *      | **            | *        | *      |        | High    | 8     |
| Thompson          | 2009 | *         | *      | *      | *      | **            |          | *      |        | High    | 7     |
| Pittman           | 2009 | *         | *      |        | *      | **            | *        | *      |        | High    | 7     |
| Kupfer            | 2010 | *         | *      |        | *      | **            | *        | *      |        | High    | 7     |
| Slattery          | 2010 | *         | *      |        | *      | **            | *        | *      |        | High    | 7     |
| Li                | 2011 | *         | *      | *      | *      | **            | *        | *      |        | High    | 8     |
| Ho                | 2011 | *         | *      |        | *      | **            | *        | *      |        | High    | 7     |
| Scollen           | 2011 | *         | *      |        | *      | **            | *        | *      |        | High    | 7     |
| Zhang             | 2014 | *         | *      | *      | *      | **            |          | *      |        | High    | 7     |
| Damavand          | 2015 | *         | *      |        | *      | **            | *        | *      |        | High    | 7     |
| Lu                | 2015 | *         | *      |        |        | **            | *        | *      |        | High    | 6     |
| Reilly            | 2021 | *         | *      |        |        | **            | *        | *      |        | High    | 6     |

Item 1, Adequate case definition; Item 2, Representativeness of the cases; Item 3, Selection of controls; Item 4, Determination of controls; Item 5, Comparability of cases and controls on the design or analysis; Item 6, Ascertainment of exposure; Item 7, Same method of ascertainment for cases and controls; Item 8, Non-response rate; one star (\*) indicates 1 point; High, studies are regarded as high quality by the NOS.
