# Supplementary material for: Association of several loci of SMAD7 with colorectal cancer: A meta-analysis based on case–control studies
Source: PubMed Central journal article supplement (PMC9829263; doi:10.1097/md.0000000000032631), 2023-01-06
Supplement: medi-102-e32631-s003.pdf [file medi-102-e32631-s003.pdf]

**Supplemental Table 3: Results of meta-regression analysis of three polymorphisms.**

| Covariates         | Number of dummy variables | dominant model | recessive model | homozygous model | heterozygous model | additive model |
|--------------------|---------------------------|----------------|-----------------|------------------|--------------------|----------------|
| <b>RS4939827</b>   |                           |                |                 |                  |                    |                |
| Ethnicity          | 4                         | 0.384          | 0.194           | 0.125            | 0.126              | 0.201          |
| Source of controls | 4                         | 0.649          | 0.653           | 0.568            | 0.853              | 0.786          |
| Genotyping methods | 10                        | 0.650          | 0.083           | 0.264            | 0.857              | 0.196          |
| Sample             | 2                         | 0.700          | 0.415           | 0.563            | 0.255              | 0.952          |
| Cons               |                           | 0.637          | 0.104           | 0.263            | 0.684              | 0.269          |
| <b>RS4464148</b>   |                           |                |                 |                  |                    |                |
| Ethnicity          | 2                         | 0.420          | 0.494           | 0.522            | 0.373              | 0.292          |
| Source of controls | 3                         | 0.496          | 0.118           | 0.233            | 0.725              | 0.314          |
| Genotyping methods | 8                         | 0.852          | 0.193           | 0.507            | 0.742              | 0.867          |
| Sample             | 2                         | 0.256          | 0.077           | 0.412            | 0.051              | 0.822          |
| Cons               |                           | 0.588          | 0.256           | 0.537            | 0.240              | 0.808          |
| <b>RS12953717</b>  |                           |                |                 |                  |                    |                |
| Ethnicity          | 4                         | 0.658          | 0.028           | 0.012            | 0.741              | 0.455          |
| Source of controls | 4                         | 0.967          | 0.637           | 0.358            | 0.920              | 0.331          |
| Genotyping methods | 8                         | 0.993          | 0.929           | 0.227            | 0.662              | 0.340          |
| Sample             | 2                         | 0.003          | 0.455           | 0.777            | 0.283              | 0.326          |
| Cons               |                           | 0.07           | 0.425           | 0.216            | 0.516              | 0.538          |

A grid with a red indicates a P value less than 0.05.
