# Supplementary material for: Association of several loci of SMAD7 with colorectal cancer: A meta-analysis based on case–control studies
Source: PubMed Central journal article supplement (PMC9829263; doi:10.1097/md.0000000000032631), 2023-01-06
Supplement: medi-102-e32631-s004.pdf [file medi-102-e32631-s004.pdf]

**Supplemental Table 4. Results of quantitative assessment of publication bias.**

| <b>SNPs</b> | <b>Dominant model</b> | <b>Recessive model</b> | <b>Homozygous model</b> | <b>Heterozygous model</b> | <b>Additive model</b> |
|-------------|-----------------------|------------------------|-------------------------|---------------------------|-----------------------|
| RS4939827   | 0.594                 | 0.597                  | 0.868                   | 0.388                     | 0.774                 |
| RS4464148   | 0.933                 | 0.673                  | 0.797                   | 0.829                     | 0.869                 |
| RS12953717  | 0.433                 | 0.909                  | 0.321                   | 0.395                     | 0.467                 |
